# Supplementary material
Source: PubMed Central journal article supplement (PMC3121857)
Supplement: 1107413108_pnas.201107413SI.pdf [file 1107413108_pnas.201107413SI.pdf]

# Supporting Information

Quiat et al. 10.1073/pnas.1107413108

## SI Methods

**Muscle Bath Measurements.** Mice were deeply anesthetized (2 mg xylazine, 20 mg ketamine per 100 g of body mass, intraperitoneally), fast-twitch extensor digitorum longus (EDL) and slow-twitch soleus muscles were excised, and nonabsorbable silk surgical suture was tied to the proximal and distal myotendinous junctions. Muscles were incubated at 30 °C in an oxygenated (95% O<sub>2</sub>-5% CO<sub>2</sub>) physiological salt solution (pH 7.6 containing in mM: 120.5 NaCl, 4.8 KCl, 1.2 MgSO<sub>4</sub>, 20.4 NaHCO<sub>3</sub>, 1.6 CaCl<sub>2</sub>, 1.2 NaH<sub>2</sub>PO<sub>4</sub>, 10.0 dextrose, 1.0 pyruvate), as previously described (1, 2). To obtain the contractile properties, muscles were fixed between a clamp and arm of a dual-mode servomotor system (300B; Aurora Scientific) at a resting tension ( $L_0$ ) of 1.0 g. Muscle activation was provided by computer-generated electrical stimulation delivered through closely flanking platinum electrodes. EDL and soleus muscles were maintained at  $L_0$  by a stepper motor. The servomotor arm, stepper motor, and electrical stimulation were controlled by Dynamic Muscle Control software (DMC Version 4.1.6, Aurora Scientific) to obtain the position and force output data from the activated muscles (1).

The protocol to obtain contractile properties consisted of five steps: (i) a pre-twitch and tetanus, followed by a 10-min rest at  $L_0$ ; (ii) a stress frequency protocol, followed by a 5-min rest at  $L_0$ ; (iii) a force-velocity protocol, followed by a 5-min rest at  $L_0$ ; (iv) a fatigue protocol; and (v) a fatigue recovery protocol. In the first step, muscles were subjected to three isometric twitches and tetani (150 Hz) spaced 1-min apart. In the second step, the muscle was subjected to stimulation at frequencies of 1, 30, 50, 80, 100, and 150 Hz, with each stimulation lasting 1 s and separated by 1 min. For the third step, maximal force output was determined from the 150-Hz tetanus determined at the end of the second step, and then corresponding shortening velocities were determined after-loaded isotonic contractions of 5%, 10%, 25%, 50%, 75%, and 90% of this maximal force, using a tetanic after-load protocol (3). The force-velocity relationship was established by plotting the mean isotonic loads (percentage of maximum force in grams) against the peak shortening velocities (mm/s) and fitting with the Hill equation (GraphPad Prism, GraphPad Software, Inc.), as previously described (4). The maximum shortening velocity for each muscle (i.e.,  $V_{max}$ ) was determined by solving the fitted Hill equation at zero load (3). In the fourth step, muscles were fatigued by stimulating at 60 Hz (EDL) or 100 Hz (soleus) for 800 ms, once every 5 s, for a total of 300 s, as previously described (5). Finally, in the fifth step, fatigue recovery was determined by collecting muscle force at 60 Hz (EDL) or 100 Hz (soleus) at 5, 10, 15, and 30 min postfatigue. At the conclusion of the protocols, muscle length was determined to the nearest 0.1 mm with a micrometer, muscle mass determined to the nearest 0.1 mg using an A-200D electronic analytical balance (Denver Instruments), and then the muscle was snap-frozen in liquid nitrogen for subsequent analysis.

**Microarray Analysis.** Pooled triplicate samples of total RNA were analyzed on an Illumina MouseWG-6 v2.0 BeadChip. Relative fold-change was then calculated by comparison of signal intensities. Fold-changes greater or less than twofold were subject to gene ontology analysis (Ingenuity Systems) with a statistical threshold of  $P = 0.01$ .

**ChIP Assay.** Snap-frozen tibialis anterior (TA) muscle from WT and Sox6 conditional knockout (cKO) mice was minced on ice and fixed with 4% PFA at room temperature for 15 min. Samples

were quenched, washed, and dounce-homogenized in lysis buffer (EZ ChIP kit; Millipore). Samples were sonicated using a bio-ruptor (Diagenode) and further prepared using EZ-ChIP kit (Millipore) according to the manufacturer's instructions. Antibody directed against the N terminus of Sox6 (6) was kindly provided by Veronique Lefebvre (The Cleveland Clinic). C2C12 myoblasts were transfected with N-terminal tagged FLAG-Sox6. C2C12 ChIP was performed using EZ-ChIP kit and anti-FLAG antibody (Sigma).

**Western Blotting.** Protein was isolated from muscle by dounce homogenization in RIPA buffer containing protease inhibitor mixture (Roche). Protein concentrations were determined by BCA Protein assay (Thermo Scientific) and samples were resolved by SDS/PAGE electrophoresis. Tnni1 and myoglobin were detected by anti-Tnni1 primary antibody (sc-8119) at a concentration of 1:1,000, and  $\alpha$ -myoglobin primary antibody (Dako) at a concentration of 1:5,000. Appropriate HRP-conjugated secondary antibodies (Biorad) at a concentration of 1:5,000 and chemiluminescent reagent (Santa Cruz) were used for detection.

**Gene-Expression Analysis.** Whole skeletal muscle was flash-frozen in liquid nitrogen, and total RNA was isolated following tissue homogenization in TRIzol (Invitrogen) according to the manufacturer's instructions. cDNA was generated by reverse-transcription using random hexamer primers (Invitrogen). Gene expression was measured by quantitative real-time PCR either with purchased gene-specific Taqman probes (ABI) or primers designed for SYBR green qPCR.

## ChIP Primers.

```
myl3-F GAGGCCTCTGTCTCCCTCTC
myl3-R CTGCTCAAGGGGCTATTTTG
myl2-F CTCCGCTCACCTACAACCTG
myl2-R ACCTCTGGAGAGTTCGAGGA
myh7-F TAAAAGCATTTCCCCGACT
myh7-R CCTGGAACCTCAGACCCTGAA
myh1-F GGGCTCAGTCTCAGTCATGC
myh1-R CAGCAGCCTCGGTGGTAT
ATP2a2-F CTAGATTGTGAAGTGCCATTGAA
ATP2a2-R GACTGGGTTTCTGTCCCTTC
```

## Gel-Shift Oligos.

```
myh7-F GCTAGGAAACAATTGGAAGTGGTCGTCATT-
GTTGTGGCA
myh7-R TGCCACAACAATGACGACCACTTCCAATTG-
TTTCTTAGC
myl3-F CCATTCTGGGCTTGAACAATGCCCTCTCCA-
GGA
myl3-R TCCTGGAGAGGGCATTGTTCAAGCCCAGGA-
ATGG
myl2-F GAGAGGTATTTATTGTTCCACAGCAGGGGCAG
myl2-R CTGCCCTGCTGTGGAACAATAAATACCTCTC
myh1-F TAAAATAGGAAACAATGTTTCAGGTGTTATT
myh1-R AATAACACCTGAACATTGTTTCTATTTTAA
ATP2a2-F AATGTTGGCAAAAACAATGTCTGTTACAATA
ATP2a2-R TATTGTAACAGACATTGTTTTGCCAACATT
myh7-MUT-F GCTAGGAGAGACGTGGAAGTGGTCGT-
CCGTCTCGTGGCA
myh7-MUT-R TGCCACGAGACGGACGACCACTTCCA-
CGTCTCTCCTAGC
```
